# Supplementary material for: First-principles investigation of quantum emission from hBN defects
Source: Royal Society of Chemistry journal article supplement (doi:10.1039/c7nr04270a), 2017-01-01
Supplement: c7nr04270a1.pdf [file c7nr04270a1.pdf]

## Supplementary Information: First principles investigation of defect emission from hBN

Sherif Abdulkader Tawfik\*,<sup>1</sup> Sajid Ali\*,<sup>1,2</sup> Marco Fronzi,<sup>1,3</sup> Mehran Kianinia,<sup>1</sup> Toan Trong Tran,<sup>1</sup> Catherine Stampfl,<sup>4</sup> Igor Aharonovich,<sup>1</sup> Milos Toth,<sup>1</sup> and Michael J. Ford<sup>1,\*</sup>

<sup>1</sup>*School of Mathematical and Physical Sciences, University of Technology Sydney, Ultimo, New South Wales 2007, Australia*

<sup>2</sup>*Department of Physics, GC University Faisalabad, Allama Iqbal Road, 38000 Faisalabad, Pakistan*

<sup>3</sup>*International Research Centre for Renewable Energy,*

*State Key Laboratory of Multiphase Flow in Power Engineering,*

*Xi'an Jiaotong University, Xi'an 710049, Shaanxi, China*

<sup>4</sup>*School of Physics, The University of Sydney, New South Wales, 2006, Australia*

### I. EXPERIMENTAL MEASUREMENT

Hexagonal boron nitride (hBN) flakes (Graphene Supermarket Inc.) were drop-casted on silicon substrate, and annealed at 850°C for half an hour in an argon atmosphere of 1 Torr.<sup>1</sup> The sample was mounted on a Helium-flown open-loop cryostat that was operated at 4 K. A continuous-wave (CW) 532 nm diode laser at 300  $\mu$ W was used as the excitation source for this study. Excitation and collection light were focused through a high numerical aperture (NA) of 0.95, giving the spot size of  $\sim$  500 nm. The collection light was spectrally filtered by a 532 nm dichroic beamsplitter and an additional 568 nm longwave-pass filter to reject reflected excitation pump and render only pure emission signal from the emitter. The signal was collected through a 62.5  $\mu$ m-core multimode fiber, acting as a pinhole to provide confocality for the photoluminescence setup. A 300g/mm grating equipped in a high-resolution charge coupled device (CCD) camera was used to spectrally resolve the emission signal. The acquisition time of 30 sec was chosen for capturing of the spectrum.

The cryogenic photoluminescence (PL) measurements were performed with a home-built confocal PL setup. A  $0.5 \times 0.5$  cm<sup>2</sup> silicon substrate was mounted in a liquid Helium flown cryostat equipped with a feedback loop heating system. The temperature was set at  $4.0 \pm 0.5$  K for the PL measurements. A 532 nm continuous-wave laser, set at 300  $\mu$ W excitation power, was used to generate a confocal map and excite the defect centers through a 0.95 numerical aperture ( $\times 150$ ) objective. The emitted light was filtered with a long pass 568 nm and collected through a multimode fiber into a spectrometer equipped with a high resolution charge coupled device (CCD) to resolve the emission spectra from the emitters.

### II. THE FIRST PRINCIPLE CALCULATION OF THE HUANG-RHYS FACTOR AND THE PL SPECTRUM

In the following, we describe the theoretical formalism for the calculation of the Huang-Rhys factor  $S_{HR}$  and the photoluminescence lineshape  $L(\hbar\omega)$ .  $L(\hbar\omega)$  is calculated according to the formula

$$L(\hbar\omega) = C\omega^3 A(\hbar\omega) \quad , \quad (1)$$

where  $A(\hbar\omega)$  is defined as the optical spectral function and  $C$  is a normalization constant. We make the following assumptions for the evaluation of  $A(\hbar\omega)$ : (1) the Born-Oppenheimer approximation whereby the degrees of freedom electrons,  $\mathbf{r}_i$  and nuclei,  $\mathbf{R}_I$ , are separated, (2) the single configurational coordinate model<sup>2</sup>, where we replace the large number of ionic position vectors  $\mathbf{R}_I$  by a single configuration coordinate,  $Q$  (this approximation justifies the use of the 1D configurational coordinate diagrams) and (3) the Frank-Condon approximation<sup>2</sup>. Then, we derive the relationship between  $A(\hbar\omega)$  and the spectral function of electron-phonon coupling  $S(\hbar\omega)$  according to the method of moments,<sup>2</sup> as follows. First, we express  $A(\hbar\omega)$  in terms of the generating function  $G(t)$ :

$$A(\hbar\omega) = \int_{-\infty}^{\infty} G(t) e^{i\omega t - \gamma|t|} dt \quad , \quad (2)$$

where  $G(t) = e^{S_+(t) + S_-(t) - S_{HR}}$ , and  $S_{\pm}(t)$  are give by

$$S_+(t) = \int_0^\infty S(\hbar\omega) e^{i\omega t} n(\hbar\omega) d(\hbar\omega) \quad (3)$$

$$S_-(t) = \int_0^\infty S(\hbar\omega) e^{-i\omega t} (n(\hbar\omega) + 1) d(\hbar\omega) \quad , \quad (4)$$

which, at zero temperature, gives  $S_+(t) = 0$  and  $S_-(t)$  becomes the Fourier transform of  $S(\hbar\omega)$ . Note that we can express  $G(t)$  as  $G(t) = e^{S_+(t)+S_-(t)}$ , setting the  $S(0)$  to zero, because it only becomes a factor in Eq. 2.

Next, we present the derivation of  $q_k$  (Eq. 4 in the main text) from the 1D configuration coordinate approximation. In this approximation, the ground state potential energy of the ions, assuming they behave as coupled harmonic oscillators, can then be written as

$$E_g(Q) = \frac{1}{2} m\omega^2 (Q - Q_{0g})^2 \quad , \quad (5)$$

where  $Q_{0g}$  is the equilibrium normal mode corresponding to ground electronic state. The excited state potential energy of the ions in normal mode  $k$  is then

$$E_e^k(Q) = E_{eg} + \frac{1}{2} m\omega^2 (Q - Q_{kg})^2 - \frac{1}{2} m\omega^2 (Q - Q_{kg})(Q_{ke} - Q_{kg}) \quad , \quad (6)$$

where the dimensionless quantity  $S_k = \frac{1}{2} m\omega^2 (Q_{ke} - Q_{kg})^2$  characterizes the strength of the electron-phonon coupling for phonon mode  $k$ , which is the partial HR factor.

The function  $S(\hbar\omega)$  is defined as follows:

$$S(\hbar\omega) = \sum_k S_k \delta(\hbar\omega - \hbar\omega_k) \quad , \quad (7)$$

$\omega_k$  is the phonon frequency and  $S_k$  is the partial HR factor. The Dirac delta function is approximated here as a gaussian with width  $\sigma$ .  $S_k$  is given by

$$S_k = \frac{\omega_k}{2\hbar} q_k^2 \quad , \quad (8)$$

where  $q_k$  is given by

$$q_k = \sum_{ai} m_a^{1/2} (R_{e,ai} - R_{g,ai}) \Delta r_{k,ai} \quad , \quad (9)$$

where  $a$  enumerates the atoms,  $i = x, y, z$ ,  $m_a$  is the atomic mass of species  $a$ ,  $R_{g/e,ai}$  is the position of atom  $a$  in the ground/excited state, and  $\Delta r_{k,ai}$  is the atomic displacement in normal coordinates. The total HR factor is then given by

$$S = \sum_k S_k \quad . \quad (10)$$

It is important to note that a multilayer hBN has out-of-plane breathing (flexural) modes, in which the hBN sheets ripple along the  $z$ -axis.<sup>3</sup> These phonon modes induce a slight planar strain which does not affect the main features of the electronic structure, and therefore will not be considered in the present analysis.

### III. CALCULATION CONVERGENCE

In order to confirm the robustness of these calculated HR factors, we have compared the HR values obtained using SIESTA against the values obtained using VASP for  $N_B V_N$  and  $2O_{2B} V_N$  on a  $7 \times 7$  supercell. The VASP results are: 4.62 for  $N_B V_N$  and 7.06 for  $2O_{2B} V_N$ . For  $N_B V_N$ , we have also calculated the HR factor in a  $5 \times 5$  supercell to compare

against the value obtained for the 7x7. The HR factor in the 5x5 supercell is 4.57, which is very close to the value obtained for the 7x7 supercell.

---

\* Electronic address: [mike.ford@uts.edu.au](mailto:mike.ford@uts.edu.au)

<sup>1</sup> Toan Trong Tran, Christopher Elbadawi, Daniel Totonjian, Charlene J. Lobo, Gabriele Grosso, Hyowon Moon, Dirk R. Englund, Michael J. Ford, Igor Aharonovich, and Milos Toth, Robust Multicolor Single Photon Emission from Point Defects in Hexagonal Boron Nitride, *ACS Nano* 10, 7331 (2016).

<sup>2</sup> T. Miyakawa and D.L. Dexter, Phonon sidebands, multiphonon relaxation of excited states, and phonon-assisted energy transfer between ions in solids, *Phys. Rev. B*, 1970, 1 2961.

<sup>3</sup> Taishan Zhu and Elif Ertekin, Resolving anomalous strain effects on two-dimensional phonon flows: The cases of graphene, boron nitride, and planar superlattices, *Phys. Rev. B* 91, 205429 (2015).
